# Supplementary material for: Brain Microdialysate Monoamines in Relation to Circadian Rhythms, Sleep, and Sleep Deprivation – a Systematic Review, Network Meta-analysis, and New Primary Data
Source: PubMed Central journal article supplement (PMC6337052; doi:10.5334/jcr.174), 2019-01-14

**Appendix 1:** Study characteristics of included publications on circadian rhythms

| Reference_ID                  | N                   | Strain                              | Age / Weight            | Sex (M/F/Both) | Lights on at (hours) | Flow rate (µL/min) | Probe length (mm) | Membrane/Probe type                           | Dialysis matrix         | Wash-out time (hours) | Sample time bin (min) | Sample analysis             |
|-------------------------------|---------------------|-------------------------------------|-------------------------|----------------|----------------------|--------------------|-------------------|-----------------------------------------------|-------------------------|-----------------------|-----------------------|-----------------------------|
| Alfinito et al (2009)         | 3-5                 | Sprague-Dawley                      | 2-3 months              | F              | ?                    | 1                  | 2                 | CMA/12                                        | aCSF                    | 3                     | 30                    | HPLC-ECD                    |
| Azekawa et al (1991)          | 6                   | Wistar                              | 250-350g                | M              | 7                    | 2                  | 1.5               | 5kDa cut off                                  | Ringer                  | 24                    | 20                    | HPLC-ECD                    |
| Barassin et al (2002)         | 9                   | Wistar                              | 250-300g                | M              | ?                    | 1                  | 1.5               | U shaped, kDa9 cut off                        | aCSF + 5µM clomipramine | 3                     | 60                    | HPLC-ECD                    |
| Barbier et al (2007)          | 3-6                 | Sprague-Dawley                      | 300-350g                | M              | 6                    | 1                  | 4                 | Eicom                                         | aCSF                    | ?                     | 60                    | HPLC- CD                    |
| Castaneda et al (2004) A1,2   | 5 (DA)<br>7 (DOPAC) | Wistar                              | 2-4 months;<br>250-350g | M              | 20                   | 1.25               | 4                 | Homemade, 5000 Da cut off                     | aCSF                    | ?                     | 30                    | Reverse phase HPLC-ECD      |
| Castaneda et al (2004) B1,2   | 5 (DA)<br>8 (DOPAC) | Wistar                              | 2-4 months;<br>250-350g | M              | 20                   | 1.25               | 2                 | Homemade, 5000 Da cut off                     | aCSF                    | ?                     | 30                    | Reverse phase HPLC-ECD      |
| Decker et al (2005)           | 6                   | Sprague-Dawley                      | 40 PND                  | M              | 7                    | 1.5                | 3                 | CMA/12                                        | aCSF                    | ?                     | 30                    | HPLC-ECD                    |
| De Marquez-Prado et al (2000) | 4                   | Wistar                              | 2-3 months ;250-350g    | M              | 8                    | 1.25               | 4                 | Concentric, home-made, 5kDa cut off           | aCSF                    | 3                     | 60                    | Reverse phase HPLC-FD       |
| Drijfhout et al (1996)        | 4                   | Albino                              | 250-300g                | M              | 6                    | 1.8                | 0.22              | Dialysis tube, saponified cellulose           | Ringer                  | ?                     | 20                    | Online derivation HPLC-FD   |
| Dudley et al (1998)A          | 12                  | Syrian                              | Adult                   | M              | 7                    | 1.2 or 1.8         | 1                 | Hemicellulose dialysis tubing, 12 kDa cut off | aCSF                    | 2                     | 60                    | HPLC-ECD with radial flow   |
| Dudley et al (1998)B          | 5                   | Syrian                              | Adult                   | M              | 7                    | 1.2 or 1.8         | 1                 | Hemicellulose dialysis tubing, 12 kDa cut off | aCSF                    | 2                     | 60                    | HPLC-ECD with radial flow   |
| Dugovic et al (2009)          | 3-11                | Sprague-Dawley                      | 300-350g                | M              | 6                    | 1                  | 4                 | Eicom                                         | aCSF                    | ?                     | 30                    | HPLC-ECD                    |
| Ezrokhi et al (2014)          | 8                   | spontaneously hypertensive & Wistar | 16 weeks; 334 ± 4g      | M              | 5                    | 0.12               | 1                 | 32-gauge dialysis probe, 20kDa cut off        | Ringer                  | 19                    | 120                   | HPLC-ECD (radial flow cell) |
| Ferris et al (2014) A         | ?                   | Sprague-Dawley                      | 375-400g                | M              | ?                    | 0.8                | 2                 | CMA/Microdialysis                             | aCSF                    | 8                     | 30                    | HPLC-ECD                    |
| Ferris et al (2014) B & C     | ?                   | DAT KO and wild type                | 28-35g                  | ?              | ?                    | 0.8                | 2                 | CMA/Microdialysis                             | aCSF                    | 8                     | 30                    | HPLC-ECD                    |

| Reference_ID                         | N   | Strain          | Age / Weight     | Sex (M/F/Both) | Lights on at (hours) | Flow rate ( $\mu\text{L}/\text{min}$ ) | Probe length (mm) | Membrane/Probe type                                          | Dialysis matrix                   | Wash-out time (hours) | Sample time bin (min) | Sample analysis             |
|--------------------------------------|-----|-----------------|------------------|----------------|----------------------|----------------------------------------|-------------------|--------------------------------------------------------------|-----------------------------------|-----------------------|-----------------------|-----------------------------|
| Fetissov et al (2000) <sup>1,2</sup> | 9   | Lean Zucker     | 350-400g         | M              | 6                    | 1.2                                    | 1                 | CMA 12, 20 kDa cut off, polycarbonate membrane               | Ringer type                       | 4?                    | 20                    | reverse phase HPLC-ECD      |
| Garabette et al (2000)               | 4-8 | Wistar          | 260-300g         | M              | 7 or 19              | 1.2                                    | 2.2               | Gambro membrane, 6 kDa cut off                               | aCSF + 1 $\mu\text{M}$ citalopram | 18                    | 15                    | reverse phase HPLC-ECD      |
| Glass et al (1992) A and D           | 6   | Siberian        | 8-15 weeks; 40g  | M              | 8                    | 1                                      | 1.5               | Hemicellulose dialysis tubing; 6kDa cutoff                   | aCSF                              | ?                     | 60                    | HPLC-ECD (radial flow cell) |
| Glass et al (1992) B                 | 1   | Siberian        | 8-15 weeks; 40g  | M              | 8                    | 1                                      | 1.5               | Hemicellulose dialysis tubing; 6kDa cutoff                   | aCSF                              | ?                     | 60                    | HPLC-ECD (radial flow cell) |
| Glass et al (1992) C                 | 7   | Siberian        | 8-15 weeks; 40g  | M              | 8                    | 1                                      | 1.5               | Hemicellulose dialysis tubing; 6kDa cutoff                   | aCSF                              | ?                     | 60                    | HPLC-ECD (radial flow cell) |
| Glass et al (1993)a                  | 7   | Syrian          | 8-15 weeks; 125g | M              | 8                    | 1                                      | 1                 | Hemicellulose dialysis tubing; 6kDa cutoff                   | aCSF                              | ?                     | 60                    | HPLC-ECD                    |
| Glass et al (1993)b                  | 6   | Syrian          | ?                | M              | 7                    | 1                                      | 0.8-1             | Hemicellulose dialysis tubing; 6kDa cutoff                   | aCSF                              | ?                     | 60                    | HPLC-ECD                    |
| Glass et al (1993)c                  | ?   | Djungarian      | >90 days         | M              | 8                    | 1                                      | 3                 | Nitrocellulose hollow fiber dialysis membrane, 6kDa cut toff | aCSF                              | ?                     | 60                    | reverse phase HPLC-ECD      |
| Grossmann et al (2000)               | 6   | Syrian          | 10-12 weeks      | M              | 5                    | 1.2                                    | ?                 | Hemicellulose, 12 kDa cutoff                                 | aCSF + 4 $\mu\text{M}$ Fluoxetine | 1                     | 20                    | HPLC-ECD                    |
| Grossmann et al (2004)               | 4   | Syrian          | 8-10 weeks       | M              | ?                    | 1.2                                    | 1                 | 12kDa cut off                                                | aCSF + 4 $\mu\text{M}$ fluoxetine | 2                     | 60                    | HPLC-ECD                    |
| Gonzalez-Pina et al (2003)           | 7   | Wistar          | 280-300g         | M              | ?                    | 1                                      | 1                 | BAS                                                          | aCSF                              | ?                     | 60                    | HPLC-ECD                    |
| Hucke et al (1998) <sup>1</sup>      | 2   | Wistar          | 200-230g         | F              | 6                    | 1.3                                    | 4                 | CMA/11                                                       | ?                                 | ?                     | 20                    | Reverse phase HPLC-ECD      |
| Hucke et al (1998) <sup>2</sup>      | 2   | Wistar          | 200-230g         | F              | 6                    | 1.3                                    | 4                 | CMA/11                                                       | ?                                 | ?                     | 20                    | Reverse phase HPLC-ECD      |
| Hood et al (2010)                    | ?   | Wistar          | 300g             | M              | 8                    | 1                                      | 2.5               | Custom made, Fisher Scientific, 13kDa                        | aCSF                              | 6                     | 30                    | HPLC                        |
| Huang et al (2008)                   | 1   | Sprague-Dawleys | 220-250g         | M              | 6                    | 2                                      | ?                 | TC-4                                                         | aCSF                              | ?                     | 10                    | FD-HPLC online              |

| Reference_ID                   | N                               | Strain                      | Age / Weight            | Sex (M/F/Both) | Lights on at (hours) | Flow rate ( $\mu\text{L}/\text{min}$ ) | Probe length (mm) | Membrane/Probe type                          | Dialysis matrix                              | Wash-out time (hours) | Sample time bin (min) | Sample analysis             |
|--------------------------------|---------------------------------|-----------------------------|-------------------------|----------------|----------------------|----------------------------------------|-------------------|----------------------------------------------|----------------------------------------------|-----------------------|-----------------------|-----------------------------|
| Izumo et al (2012)             | 7-8                             | Wistar                      | 8 weeks; 180-200g       | F              | 7                    | 1                                      | ?                 | ?                                            | Ringer                                       | 2                     | 20                    | HPLC-ECD                    |
| Jitsuki et al (2009) A         | 7                               | Wistar-Imamichi             | 2-3 months              | M              | 5                    | 1.2                                    | 1                 | AI-4-1                                       | aCSF                                         | ?                     | 30                    | HPLC-ECD                    |
| Jitsuki et al (2009) B & C     | 10                              | Wistar-Imamichi             | 2-3 months              | F              | 5                    | 1.2                                    | 1                 | AI-4-1                                       | aCSF                                         | ?                     | 30                    | HPLC-ECD                    |
| Kalen et al (1989)             | 4(NAD, 5-HT, 5-HIAA)<br>2 (NAD) | Sprague-Dawley              | 300g                    | F              | ?                    | 2                                      | 8                 | Flexible SCE cellulose tubing, 10kDa cut off | Ringer +1 $\mu\text{M}$ indalpine for 3 rats | 0.5                   | 30                    | HPLC-FD                     |
| Knoch et al (2004)             | ?                               | Syrian                      | Adult                   | M              | ?                    | 1.2                                    | 1                 | Hemicellulose dialysis tubing, 12kDa cut off | aCSF + 4 $\mu\text{M}$ citalopram            | ?                     | 60                    | HPLC-ECD                    |
| Linthorst et al (1994)         | 6-7                             | Wistar                      | 250g                    | M              | 7:30                 | 2                                      | 4                 | CMA/12, 20kDa cut off                        | Sterile pyrogen free Ringer                  | ?                     | 30                    | HPLC-ECD                    |
| Liu et al (2005)               | 1                               | Sprague-Dawley              | ?                       | M              | 11                   | 2                                      | 4                 | CMA/12, 20kDa cut off                        | aCSF                                         | ?                     | 10                    | HPLC-FD                     |
| Liu et al (2006) A             | 1                               | Lewis                       | 2-4 months              | M              | 6                    | 2                                      | 4                 | CMA/12, 20 kDa cut off                       | aCSF                                         | ?                     | 10                    | HPLC-FD                     |
| Liu et al (2006) B             | 6                               | Sprague-Dawley              | 2-4 months              | M              | 6                    | 2                                      | 4                 | CMA/12, 20 kDa cut off                       | aCSF                                         | ?                     | 10                    | HPLC-FD                     |
| Liu et al (2006) C             | 8                               | Outbred wistar, per1-luc TG | 2-4 months              | M              | 6                    | 2                                      | 4                 | CMA/12, 20 kDa cut off                       | aCSF                                         | ?                     | 10                    | HPLC-FD                     |
| Liu et al (2006) D             | 4                               | PVG                         | 2-4 months              | M              | 6                    | 2                                      | 4                 | CMA/12, 20 kDa cutoff                        | aCSF                                         | ?                     | 10                    | HPLC-FD                     |
| Liu et al (2006) E             | 4                               | Lewis                       | 2-4 months              | M              | 6                    | 2                                      | 4                 | CMA/12, 20 kDa cutoff                        | aCSF                                         | ?                     | 10                    | HPLC-FD                     |
| Liu et al (2006) F             | 4                               | Syrian                      | 2-4 months              | M              | 6                    | 2                                      | 4                 | CMA/12, 20 kDa cutoff                        | aCSF                                         | ?                     | 10                    | HPLC-FD                     |
| Lopez-Rodriguez et al (2003) a | 5                               | Sprague-Dawley              | 300-500g                | M              | 1                    | 2                                      | 4                 | CMA/11                                       | aCSF                                         | ?                     | 90                    | HPLC-ECD                    |
| Luo et al (1998)               | 5-6                             | Syrian                      | 14 weeks; 208 $\pm$ 5g  | M              | 8.5                  | 0.12                                   | 1                 | 32-gauge dialysis probe, 20kDa cut off       | Filtered Ringer's solution                   | 5                     | 60                    | HPLC-ECD (radial flow cell) |
| Luo et al (1999)               | 5-6                             | Syrian                      | 14 weeks; 185-195g      | M              | 8.5                  | 0.12                                   | 1                 | 32-gauge dialysis probe, 20kDa cut off       | Filtered Ringer's solution                   | 3                     | 120                   | HPLC-ECD                    |
| Luo et al (2000)               | 5-6                             | Syrian                      | 14 weeks; 185 $\pm$ 10g | M              | 0                    | 0.12                                   | ?                 | ?                                            | Ringer                                       | ?                     | 17                    | HPLC-ECD (radial flow cell) |
| Luo et al (2004)               | 10                              | ?                           | ?                       | ?              | ?                    | ?                                      | ?                 | ?                                            | ?                                            | ?                     | 24                    | HPLC                        |

| Reference_ID                     | N                     | Strain                | Age / Weight       | Sex (M/F/Both) | Lights on at (hours) | Flow rate ( $\mu\text{L}/\text{min}$ ) | Probe length (mm) | Membrane/Probe type                            | Dialysis matrix              | Wash-out time (hours) | Sample time bin (min) | Sample analysis        |
|----------------------------------|-----------------------|-----------------------|--------------------|----------------|----------------------|----------------------------------------|-------------------|------------------------------------------------|------------------------------|-----------------------|-----------------------|------------------------|
| Morien et al (1995)1 and 2       | 6                     | Albino Sprague-Dawley | 350-400g           | M              | 7                    | 2                                      | 2                 | Cellulose fiber spectrum,membrane 6kDa cut off | Ringer                       | ?                     | 20                    | Reverse phase HPLC-ECD |
| Mitome et al (1994)a             | 7                     | Wistar                | 12 weeks; 450-550g | M              | 6                    | 1                                      | 1                 | 1kDa cut off                                   | "Collagen solution"          | ?                     | 120                   | HPLC-ECD               |
| Mitome et al (1994)b             | 7                     | Wistar                | ?                  | M              | 6                    | 1                                      | 0.6 <sup>2</sup>  | Homemade, 1kDa cut off                         | Ringer                       | 2                     | 120                   | HPLC-ECD               |
| Nakayama et al (1993)            | 4                     | Wistar                | 300-350g           | M              | 8                    | ?                                      | 3                 | Dialysis probe                                 | ?                            | 12                    | 23                    | ?                      |
| Nakayama et al (2002) 1,2, and 3 | 6                     | Wistar                | 300-350g           | M              | 8                    | 2                                      | 3                 | 50kDa cut off                                  | Ringer                       | ?                     | 23                    | HPLC-ECD               |
| Oshima et al (2003)*             | 6 (5-HT)<br>7(5-HIAA) | C57Bl/6N              | 12-16 weeks        | M              | 6                    | 2                                      | 3                 | CMA/11,cuprophane, 6kDa cut off                | Ringer                       | ?                     | 30 then 60            | HPLC-ECD               |
| Paulson et al (1994)1            | ?                     | Holtzman              | Adult; 250-300g    | M              | 6                    | 1.5                                    | 3                 | Concentric-style probes                        | Perfusion medium             | ?                     | 20                    | HPLC-ECD               |
| Paulson et al (1994)2            | ?                     | Holtzman              | Adult; 250-300g    | M              | 6                    | 1.5                                    | 2                 | Concentric-style probes                        | Perfusion medium             | ?                     | 20                    | HPLC-ECD               |
| Paulson et al (1996)1            | 17                    | Han-Wistar            | Adult; 250-300g    | M              | 6                    | 1.5                                    | 2                 | Coated cyanoacrylate glue membrane             | Perfusion medium             | ?                     | 20                    | HPLC-ECD               |
| Paulson et al (1996)2            | 18                    | Han-Wistar            | Adult; 250-300g    | M              | 6                    | 1.5                                    | 2                 | Coated cyanoacrylate glue membrane             | Perfusion medium             | ?                     | 20                    | HPLC-ECD               |
| Pealva et al (2002)A,B,C         | 7-13                  | CHR-R1 +/-, +/-, -/-  | 12-16 weeks;38g    | M              | 6                    | 2                                      | 3                 | CMA/11,cuprophane, 11kDa cut off               | Sterile, pyrogen-free Ringer | ?                     | 30                    | HPLC-ECD               |
| Robinson et al (1991)            | 7                     | ?                     | Adult              | F              | ?                    | 2                                      | 5                 | CMA/10, 20kDa cut off                          | Ringer                       | 2-3                   | 20                    | HPLC-ECD               |
| Sano et al (1992)A, C            | ?                     | Wistar                | 2-6 months         | M              | 6                    | 1.5                                    | 3.2               | 5kDa cut off                                   | Ringer                       | 3                     | 30                    | HPLC-ECD               |
| Sano et al (1992)B               | ?                     | Wistar                | 22-27 months       | M              | 6                    | 1.5                                    | 3.2               | 5kDa cut off                                   | Ringer                       | 3                     | 30                    | HPLC-ECD               |
| Sano et al (1992)D               | ?                     | Wistar                | 24-26 months       | M              | 6                    | 1.5                                    | 3.2               | 5kDa cut off                                   | Ringer                       | 3                     | 30                    | HPLC-ECD               |

| Reference_ID           | N                     | Strain                | Age / Weight    | Sex (M/F/Both) | Lights on at (hours) | Flow rate ( $\mu\text{L}/\text{min}$ ) | Probe length (mm) | Membrane/Probe type                         | Dialysis matrix          | Wash-out time (hours) | Sample time bin (min) | Sample analysis        |
|------------------------|-----------------------|-----------------------|-----------------|----------------|----------------------|----------------------------------------|-------------------|---------------------------------------------|--------------------------|-----------------------|-----------------------|------------------------|
| Sayer et al (1999)     | 4                     | Wistar                | 240-260g        | M              | 6                    | 1                                      | 2                 | CMA/12                                      | aCSF + citalopram (1 mM) | 1.5                   | 15                    | HPLC-ECD               |
| Smriga et al (2000)a   | 3-4                   | Wistar                | 250-280g        | M              | 7                    | 1                                      | 2                 | 50kDa cut off                               | Modified Ringer          | 4                     | 20                    | HPLC                   |
| Smriga et al (2000)b   | 3                     | Wistar                | 250-280g        | M              | 7                    | 1                                      | 1                 | 50kDa cut off                               | Modified Ringer          | 4?                    | 15                    | HPLC                   |
| Smriga et al (2002)    | 4                     | Wistar                | 250-280g        | M              | 7                    | 1                                      | 2                 | 50kDa cut off                               | Modified Ringer          | ?                     | 30                    | HPLC                   |
| Smith et al (1992)     | 5                     | Wistar                | 275-300g        | M              | 7                    | 0.057                                  | 4                 | Homemade probe (cellulose tubing)           | aCSF                     | 7                     | 90                    | HPLC                   |
| Stanley et al (1989)a  | 11                    | Sprague-Dawley        | Adult           | M              | 9                    | 1                                      | 2                 | 6kDa cut off                                | Ringer                   | 24                    | 20                    | Reverse Phase HPLC-ECD |
| Stanley et al (1989)b  | 11                    | Albino Sprague-Dawley | 360-380g        | M              | 9                    | 1                                      | 5                 | Homemade 6 kDa cut off                      | Ringer                   | ?                     | 120                   | Reverse Phase HPLC-ECD |
| Sun et al (2002)       | 1-5                   | Sprague-Dawley        | Adult; 200-300g | M              | 11                   | 2                                      | 3-4               | CMA/12, 20kDa cut off                       | aCSF                     | ?                     | 10                    | HPLC-FD                |
| Sun et al (2003)       | 113; 1 representative | Sprague-Dawley        | 220-225g        | M              | 11                   | 2                                      | 4                 | CMA/12                                      | aCSF                     | 132                   | 10                    | HPLC-FD                |
| Takahashi et al (1998) | 5-10                  | Wistar                | 200-250g        | ?              | ?                    | 2                                      | 3                 | 50kDa cut off                               | Physiological solution   | ?                     | 20                    | Reverse Phase HPLC-ECD |
| Verhagen et al (2009)  | 7                     | Wistar                | 155-165g        | F              | 2                    | 2                                      | 4                 | U-shaped tip, dialysis fiber, 10kDa cut off | Ringer                   | 6                     | 60                    | HPLC-ECD               |
| Yang et al (2013)A,B,C | 14                    | SERT +/+, +/-, -/-    | ?               | Both           | 4                    | 3                                      | 2                 | CMA/7                                       | aCSF                     | 3                     | 3                     | HPLC-ECD               |

Lower case letters indicate publications from the same authors and year; upper case letters represent separate groups within publications; numbers represent separate brain regions within animals \*30 min samples 9h-20h and 60min samples 20h-9h.

Abbreviations: M: Male; F: Female; DAT KO: Dopamine transporter Knock Out; CHR-R1: Corticotropin release hormone receptor 1; SERT: serotonin transporter; aCSF: artificial Cerebrospinal Fluid; HPLC: High Pressure Liquid Chromatographic; ECD: Electrochemical Detection; FD: Fluorescence Detection; CD: Coulometric detection;  $\mu\text{M}$ : micromol/L; mM: milimol/L; kDa: KiloDalton.

**Appendix 2:** Study characteristics of included publications on sleep stages

| Reference_ID                    | N  | Strain         | Age/Weight      | Sex (M/F/Both) | Light at (hours) | Sleep detection                                             | Flow rate (µL/min) | Probe length (mm) | Membrane/Probe type                         | Dialysis matrix | Washout time (hours) | Measurement duration (hours) | Baseline duration (hours) | Sample bin (min) | Sample analysis                  |
|---------------------------------|----|----------------|-----------------|----------------|------------------|-------------------------------------------------------------|--------------------|-------------------|---------------------------------------------|-----------------|----------------------|------------------------------|---------------------------|------------------|----------------------------------|
| Bellesi et al (2016)A1,A2       | 8  | C57BL/6N       | 9-10 weeks      | ?              | 8                | EEG and EGM                                                 | 1                  | 1.5               | AN69, 12 kDa cut off                        | aECF            | 2                    | 8                            | 2                         | 30               | Reverse Phase Ion Paired HPLC-CD |
| Bjorvatn et al (2002) A1        | 8  | Sprague-Dawley | 250-300g        | M              | 6                | Fronto-frontal EEG, fronto-parietal EEG and neck muscle EMG | 0.8                | 4                 | CMA/12                                      | aCSF            | 1                    | 7                            | 0.66-1                    | 20 every hour    | HPLC-ECD                         |
| Bjorvatn et al (2002) A2        | 6  | Sprague-Dawley | 250-300g        | M              | 6                | Fronto-frontal EEG, fronto-parietal EEG and neck muscle EMG | 0.8                | 3                 | CMA/12                                      | aCSF            | 1                    | 7                            | 0.66-1                    | 20 every h       | HPLC-ECD                         |
| Blanco-centurion et al (2001) A | 5  | Wistar         | 250-300g        | M              | 8                | EOG and EMG                                                 | 2.5                | 1                 | Microdialysis probe (Bioanalytical Systems) | aCSF            | 8                    | 4                            | ?                         | 2                | HPLC-ECD                         |
| De saint Hilaire et al (2000)   | 5  | Wistar         | 250-300g        | M              | 6                | EEG, EMG                                                    | 2                  | 2                 | CMA microdialysis                           | aCSF            | 4                    | 4                            | No BL                     | 3                | HPLC-ECD                         |
| Fiske et al (2006)1             | 11 | Sprague-Dawley | 200-350g        | M              | 6                | EEG and EMG                                                 | 0.8                | 1                 | CMA /12                                     | aCSF            | 2                    | 10                           | ?                         | 10               | HPLC-ECD                         |
| Fiske et al (2006)2             | 11 | Sprague-Dawley | 200-350g        | M              | 6                | EEG and EMG                                                 | 0.8                | 3                 | CMA /12                                     | aCSF            | 2                    | 10                           | ?                         | 10               | HPLC-ECD                         |
| Fiske et al (2008)1             | 6  | Sprague-Dawley | 250-300g        | ?              | 6                | EEG and EMG                                                 | 1                  | 1                 | ?                                           | aCSF            | 2                    | ?                            | ?                         | 5 at least       | HPLC-ECD                         |
| Fiske et al (2008)2             | 6  | Sprague-Dawley | 250-300g        | ?              | 6                | EEG and EMG                                                 | 1                  | 3                 | ?                                           | aCSF            | 2                    | ?                            | ?                         | 5 at least       | HPLC-ECD                         |
| Gronli et al (2007)             | 4  | Sprague-Dawley | 11 weeks ; 300g | M              | 7                | EEG, EMG                                                    | 1.2                | 4                 | CMA/12                                      | aCSF            | 2                    | 3-6                          | ?                         | 20               | HPLC-ECD                         |

|                            |     |                                  |                    |      |      |                                           |     |   |                                                 |                             |            |       |            |    |                           |
|----------------------------|-----|----------------------------------|--------------------|------|------|-------------------------------------------|-----|---|-------------------------------------------------|-----------------------------|------------|-------|------------|----|---------------------------|
| Iwakiri et al (1993)       | 5   | ?                                | 2.4-3.4kg          | Both | ?    | EEG, EMG, EOG and PGO                     | 1   | 3 | 4.5kDa cut off                                  | Ringer                      | ?          | ?     | ?          | 20 | Reverse Phase HPLC-ECD    |
| Lapierre et al (2012)      | 4   | Nothern fur                      | Juvenile           | ?    | ?    | EEG, EOG, neck EMG                        | ?   | ? | ?                                               | ?                           | ?          | ?     | ?          | ?  | HPLC-ECD                  |
| Lapierre et al (2013)a     | 4   | Nothern fur                      | 2-3 years; 20-21kg | Both | 8    | EEG, EMG, EOG                             | 1.5 | 4 | CMA/12 Elite Microdialysis Probe, 20kDa cut off | aCSF                        | ?          | 40    | At least 4 | 10 | HPLC-ECD                  |
| Lapierre et al (2013)b     | 3   | Nothern fur, Callorhinus ursinus | Juvenile           | ?    | ?    | EEG, EOG and neck EMG                     | ?   | ? | 14 probes                                       | ?                           | ?          | ?     | ?          | ?  | HPLC-ECD                  |
| Lena et al (2005)1         | 6   | Wistar                           | 280-320g           | M    | 8    | EEG and EMG                               | 1   | 3 | CMA/12,20 kDa cut-off                           | Ringer                      | 4          | ?     | ?          | 2  | Capillary Electrophoresis |
| Lena et al (2005)2         | 6   | Wistar                           | 280-320g           | M    | 8    | EEG and EMG                               | 1   | 2 | CMA/12,20 kDa cut-off                           | Ringer                      | 4          | ?     | ?          | 2  | Capillary Electrophoresis |
| Lyamin et al (2016)        | 4   | Nothern fur                      | 2-3 years; 18-25kg | Both | 8    | EEG, EOG, EMG                             | 1   | 4 | CMA-12 Elite Microdialysis Probe, 20kDa cut off | aCSF                        | 4          | 42    | ?          | 10 | HPLC-ECD                  |
| Mukaida et al (2007)       | 6-7 | Wistar                           | 230-300g           | M    | 7    | EEG                                       | 2   | 2 | A-I-8                                           | aCSF                        | 2          | ?     | 2          | 10 | HPLC-ECD                  |
| Nicolaidis et al (2001)1,2 | ?   | Wistar                           | 250-300g           | M    | ?    | EEG + visual inspection                   | 2   | 2 | CMA, 20kDa cut off                              | Ringer like                 | 3          | ?     | ?          | 6  | Reverse phase HPLC-ECD    |
| Orosco et al (1995)        | 5   | Wistar                           | 250-300g           | M    | 6    | EEG                                       | 2   | 2 | Carnegie, 20 kDa cut off                        | Ringer                      | 3          | ?     | ?          | 6  | Reverse phase HPLC-ECD    |
| Park et al (1999)          | 5   | Sprague-Dawley                   | 300-550g           | M    | 7    | EEG, EMG and dorsal hippocampus recording | 2   | 4 | CMA/11 or CMA/12                                | aCSF                        | 4          | 72-96 | ?          | 5  | HPLC-ECD                  |
| Park et al (2002)          | 5   | Sprague-Dawley                   | 300-580g           | M    | 7    | EEG, EMG and dorsal hippocampus recording | 2   | 2 | CMA/11                                          | aCSF                        | 24         | 72-96 | ?          | 5  | HPLC-ECD                  |
| Penalva et al (2003) A     | 11  | Wistar                           | 220g               | M    | 7:30 | EEG and EMG                               | 2   | 4 | CMA/12                                          | Sterile pyrogen-free Ringer | 40-45      | 3     | ?          | 3  | HPLC-ECD                  |
| Portas et al (1994)        | 6   | ?                                | 3-5kg              | ?    | N/A  | EEG, EOG, EMG, PGO                        | 3   | 2 | CMA/10                                          | aCSF                        | 1.666      | ?     | ?          | 3  | HPLC-ECD                  |
| Portas et al (1996)        | 5   | ?                                | 3kg                | M    | N/A  | EEG, EMG, EOG, PGO                        | 1.5 | 1 | CMA/10, 20 kDa cut off                          | aCSF                        | 1 at least | 10    | 120        | 5  | HPLC-ECD                  |
| Portas et al (1998)1       | 7   | Sprague-Dawley                   | 240-295g           | M    | 6    | EEG, EMG                                  | 1   | 1 | CMA/12                                          | aCSF                        | ?          | 8     | 180        | 5  | HPLC-ECD                  |

|                                      |     |                |                     |      |   |                        |     |   |                                        |                            |    |            |     |        |                         |
|--------------------------------------|-----|----------------|---------------------|------|---|------------------------|-----|---|----------------------------------------|----------------------------|----|------------|-----|--------|-------------------------|
| Portas et al (1998) <sup>2</sup>     | 4   | Sprague-Dawley | 240-295g            | M    | 6 | EEG, EMG               | 1   | 3 | CMA/12                                 | aCSF                       | ?  | 8          | 180 | 5      | HPLC-ECD                |
| Python et al (2001)                  | 6   | Wistar         | 250-300g            | M    | 8 | EEG and EMG            | 2   | 2 | 20kDa cut off                          | Ringer type                | 4  | 3          | ?   | 2      | Reversed Phase HPLC-ECD |
| Shouse et al (2000) <sup>a 1,2</sup> | 8   | Epilepsy model | Pre-adolescent      | ?    | ? | ?                      | 2   | ? | ?                                      | ?                          | ?  | 6-8        | ?   | 5      | ?                       |
| Shouse et al (2000) <sup>b 1,2</sup> | 6   | ?              | 5-6 months; 2.1kg   | Both | ? | EEG, EOG, EMG          | 2   | 2 | Polyamide tubing, Eicom DM-22 membrane | aCSF                       | ?  | At least 2 | ?   | 5      | HPLC-ECD                |
| Shouse et al (2001) <sup>a 1,2</sup> | 8   | ?              | 6-6.5 months; 2.1kg | Both | ? | EEG, EOG, EMG          | 2   | 2 | Eicom DM-22                            | aCSF                       | ?  | 1          | 1   | 5      | HPLC-ECD                |
| Shouse et al (2001) <sup>b 1,2</sup> | 8   | ?              | 6-6.5 months; 2.1kg | Both | ? | EEG, EOG, EMG          | 2   | 2 | Eicom DM-22 membrane                   | aCSF                       | ?  | 6-8        | ?   | 5      | HPLC-ECD                |
| Strecker et al (1999)                | 7-9 | ?              | Adult               | M    | ? | EEG, EOG, EMG, and PGO | 1.5 | 2 | CMA 10, 20 kDa cut off                 | aCSF                       | 16 | 4          | ?   | 7.5-10 | HPLC-ECD                |
| Wilkinson et al (1991)               | 5   | ?              | ?                   | ?    | ? | EEG, EMG, EOG          | 2   | 5 | 6kDa                                   | Degassed dialysis solution | 8  | 150        | ?   | 30     | HPLC-ECD                |
| Zeitzer et al (2002)                 | 1   | Homo sapiens   | 24 years old        | M    | ? | EEG                    | 0.5 | ? | ?                                      | aCSF                       | ?  | 6.5        | ?   | 10     | HPLC-ECD                |

Lower case letters indicate publications from same authors and year; upper case letters represent separate groups within publications; numbers represent separate brain regions within animals. Abbreviations: M: Male; F: Female EEG: Electroencephalogram; EMG: Electromyogram; EOG: Electrooculogram; PGO: Ponto-Geniculo-Occipital Wave Recording; aCSF: artificial Cerebrospinal Fluid; aECF: artificial Extracerebral Fluid; HPLC: High Pressure Liquid Chromatography; ECD: Electrochemical Detection; kDa: Kilo Dalton



**Appendix 3: Study characteristic of included publications on sleep deprivation**

| Reference_ID                   | N  | Strain         | Age/Weight | Sex (M/F/Both) | Light at (hours) | Onset time SD (hours) | Flow rate (µL/min) | Probe length (mm) | Probe/Membrane type                         | Dialysate matrix         | Washout time (hours) | Measurement duration (hours) | Baseline duration (hours) | Sample bin (min) | Sample analysis                  |
|--------------------------------|----|----------------|------------|----------------|------------------|-----------------------|--------------------|-------------------|---------------------------------------------|--------------------------|----------------------|------------------------------|---------------------------|------------------|----------------------------------|
| Bellesi et al (2016)B1, B2     | 8  | C57BL/6        | 9-10 weeks | ?              | 8                | 17                    | 1                  | 1.5               | AN69, 12 kDa cut off                        | aECF                     | 2                    | 8                            | 2                         | 30               | Reverse Phase Ion Paired HPLC-CD |
| Bjorvatn et al (2002) B1       | 8  | Sprague-Dawley | 250-300g   | M              | 6                | 7:30                  | 0.8                | 4                 | CMA/12                                      | aCSF                     | 1                    | 7                            | 0.66-1                    | 20               | HPLC-ECD                         |
| Bjorvatn et al (2002)B2        | 8  | Sprague-Dawley | 250-300g   | M              | 6                | 7:30                  | 0.8                | 3                 | CMA/12                                      | aCSF                     | 1                    | 7                            | 0.66-1                    | 20               | HPLC-ECD                         |
| Blanco-centurion et al (2001)  | 7  | Wistar         | 250-300g   | M              | 8                | 20                    | 0.5                | 1                 | Microdialysis probe (Bioanalytical Systems) | aCSF                     | 16                   | 48                           | ?                         | ≤ 3              | HPLC-ECD                         |
| Grossmann et al (2000)B        | 12 | Syrian         | 10-12weeks | M              | 5                | 13                    | 1.2                | ?                 | Hemicellulose, 12 kDa cut off               | aCSF + 4.0 µM Fluoxetine | 1                    | 11                           | 3                         | 20               | HPLC-ECD                         |
| Grossmann et al (2000) C       | 6  | Syrian         | 10-12weeks | M              | 5                | 13                    | 1.2                | ?                 | Hemicellulose, 12 kDa cut off               | aCSF + 4.0 µM Fluoxetine | 1                    | 11                           | 3                         | 20               | HPLC-ECD                         |
| Lopez-Rodriguez et al (2003)a  | 6  | Sprague-Dawley | 300-500g   | M              | 1                | 13                    | 2                  | 4                 | CMA/11                                      | aCSF                     | ?                    | 24                           | 24                        | 1.5              | HPLC-ECD                         |
| Lopez-Rodriguez et al (2003)b  | 6  | Sprague-Dawley | 300-350g   | M              | 8                | 12                    | 2                  | 4                 | CMA/11                                      | aCSF                     | ?                    | 16                           | 3                         | 30               | HPLC-ECD                         |
| Murillo-Rodriguez et al (2016) | 10 | Wistar         | 250-300g   | M              | 7                | 7                     | 0.25               | 1                 | polyacrylonitrile, 30 kDa cut off           | aCSF                     | 24                   | 6                            | ?                         | 20 every hour    | HPLC-ECD                         |

|                        |   |            |                         |   |      |       |   |   |        |                                       |       |    |   |    |          |
|------------------------|---|------------|-------------------------|---|------|-------|---|---|--------|---------------------------------------|-------|----|---|----|----------|
| Penalva et al (2003) B | 6 | Wistar     | 220g                    | M | 7:30 | 7:30  | 2 | 4 | CMA/12 | Sterile, pyrogen-free Ringer solution | 40-45 | 6  | 3 | 3  | HPLC-ECD |
| Penalva et al (2002) C | 5 | Wistar     | 220                     | M | 7:30 | 7:30  | 2 | 4 | CMA/12 | Sterile, pyrogen-free Ringer solution | 40-45 | 6  | 3 | 15 | HPLC-ECD |
| Zant et al (2010)      | ? | Han-wistar | ?                       | M | ?    | ?     | ? | ? | ?      | ?                                     | ?     | ?  | ? | ?  | HPLC     |
| Zant et al (2011)      | 8 | Han-wistar | 3-4 months;<br>300-400g | M | 8:30 | 10:30 | 1 | 2 | CMA/11 | aCSF                                  | ?     | 10 | 1 | 20 | HPLC-ECD |

*Lower case letters indicate publications from the same authors and year; upper case letters represent separate groups within publications; numbers represent separate brain regions within animals. Abbreviations: M: Male; aCSF: artificial Cerebrospinal Fluid; HPLC: High Pressure Liquid Chromatography; ECD: Electrochemical Detection; CD: Coulometric detection*

**Appendix 4: Risk of bias – questions adapted to microdialysis studies**

| Component                                                                                                                      | Comments/Clarification                                                                                                                                                                                                                                               |
|--------------------------------------------------------------------------------------------------------------------------------|----------------------------------------------------------------------------------------------------------------------------------------------------------------------------------------------------------------------------------------------------------------------|
| 1. Was any aspect of the experiment blinded?                                                                                   | Yes: Blinding was performed and adequately described for at least part of the experiment.<br>No: Blinding is not mentioned, and/or it was insufficiently described or performed                                                                                      |
| 2. Was the location of probe implantation detailed by coordinates and verified after the experiments (histology or otherwise)? | Yes: The study described the coordinates used for implantation and histological or other verification confirmed the probe's location within the brain<br>No: At most the name of the brain region was given and/or verification of probe location was not mentioned. |
| 3. Was the analysis technique described?                                                                                       | Yes: the measurement technique was described.<br>No: the measurement technique was not described                                                                                                                                                                     |
| 4. Was the probe recovery calculation reported? Are there corresponding values presented?                                      | Yes: Probe recovery calculation is described. The value(s) is/are explicitly stated.<br>No: Neither are reported                                                                                                                                                     |
| 5. Did the authors reported the timing and/or the phases of light/dark cycle?                                                  | Yes: Starting and finishing time of the experiment and the light/dark cycle are reported.<br>No: Timing and/or light/dark cycles were not reported.                                                                                                                  |
| 6. If applicable: Is the technique used to determine sleep stages reported and is it valid?                                    | Yes: Sleep stages were adequately determined.<br>No: sleep stage determination was either not reported or not adequate (non-validated algorithms, videotaping..)                                                                                                     |
| 7. If applicable: Was sleep deprivation properly performed and described?                                                      | Yes: sleep deprivation was adequately performed and described<br>No: Invalid method and/or insufficiently reported                                                                                                                                                   |
| 8. Were the animal characteristics properly described?                                                                         | Yes: The authors mentioned species, age, gender of the animals, and the number of animals used<br>No: The authors did not describe one or more of the above                                                                                                          |
| 9. Was a power analysis performed?                                                                                             | Yes: A proper power analysis was performed and reported<br>No: A power analysis was not reported                                                                                                                                                                     |
| 10. Was the study approved by an ethical board?                                                                                | Yes/Not reported/ No                                                                                                                                                                                                                                                 |
| 11. Is there a conflict of interest statement?                                                                                 | Yes/Not reported/ No                                                                                                                                                                                                                                                 |

Appendix 5: Forest plot comparing serotonin concentration (nanomole/L) during wake and slow waves sleep

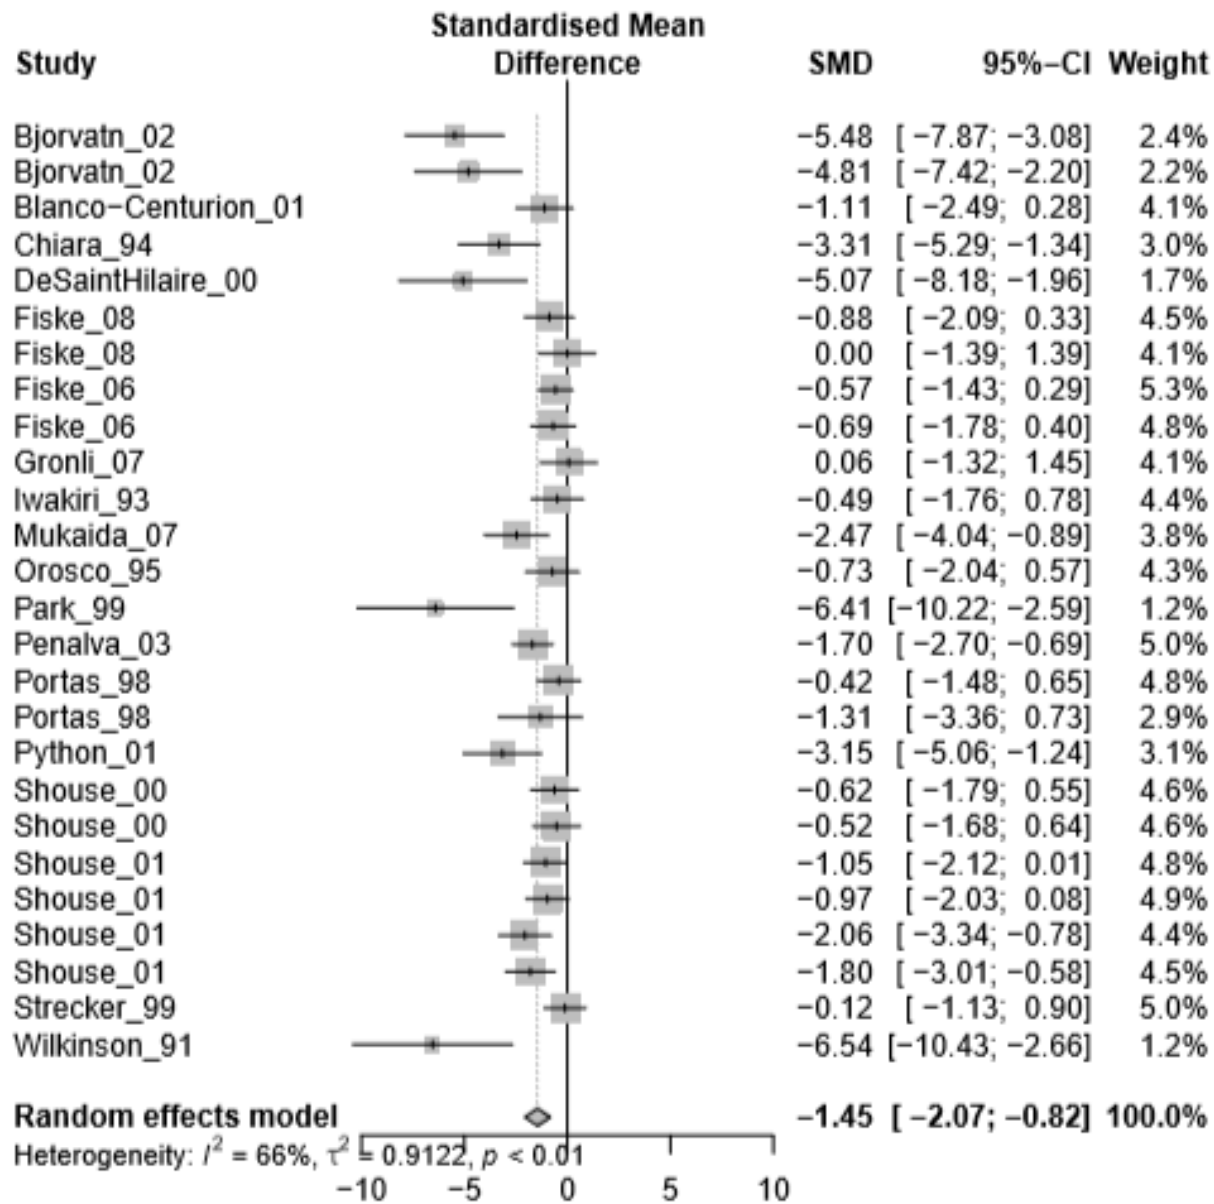

Appendix 6: Forest plot comparing serotonin concentration (nanomole/L) during wake and rapid-eye movement sleep

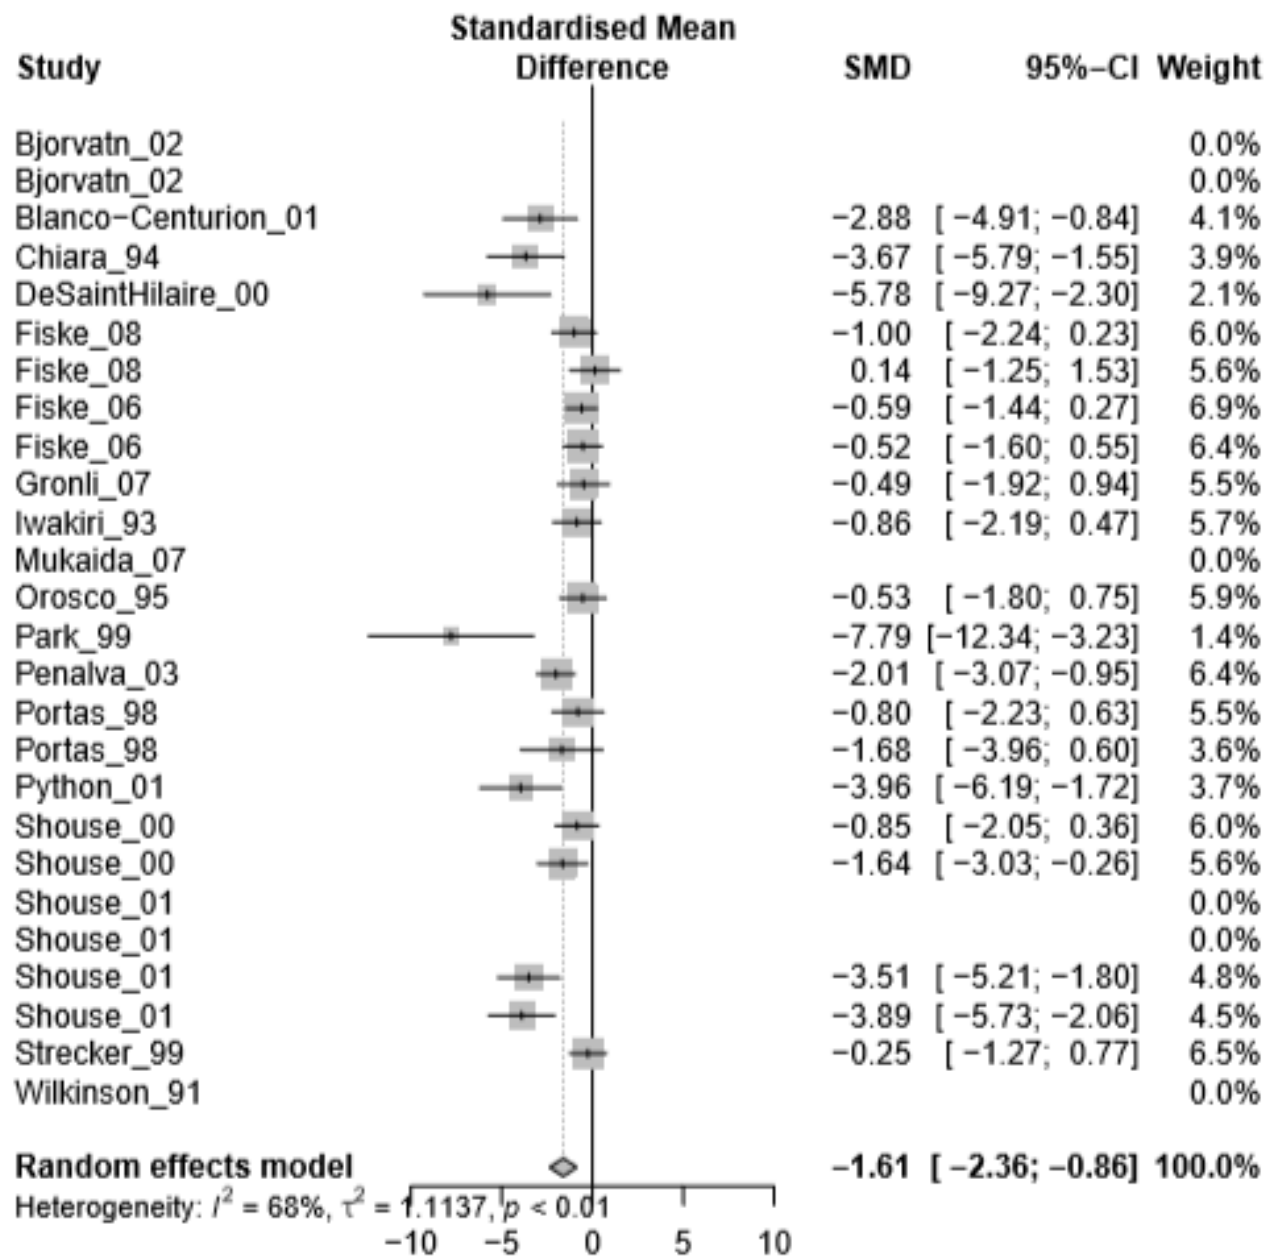

Appendix 7: Forest plot comparing noradrenaline concentration (nanomole/L) during wake and slow waves sleep

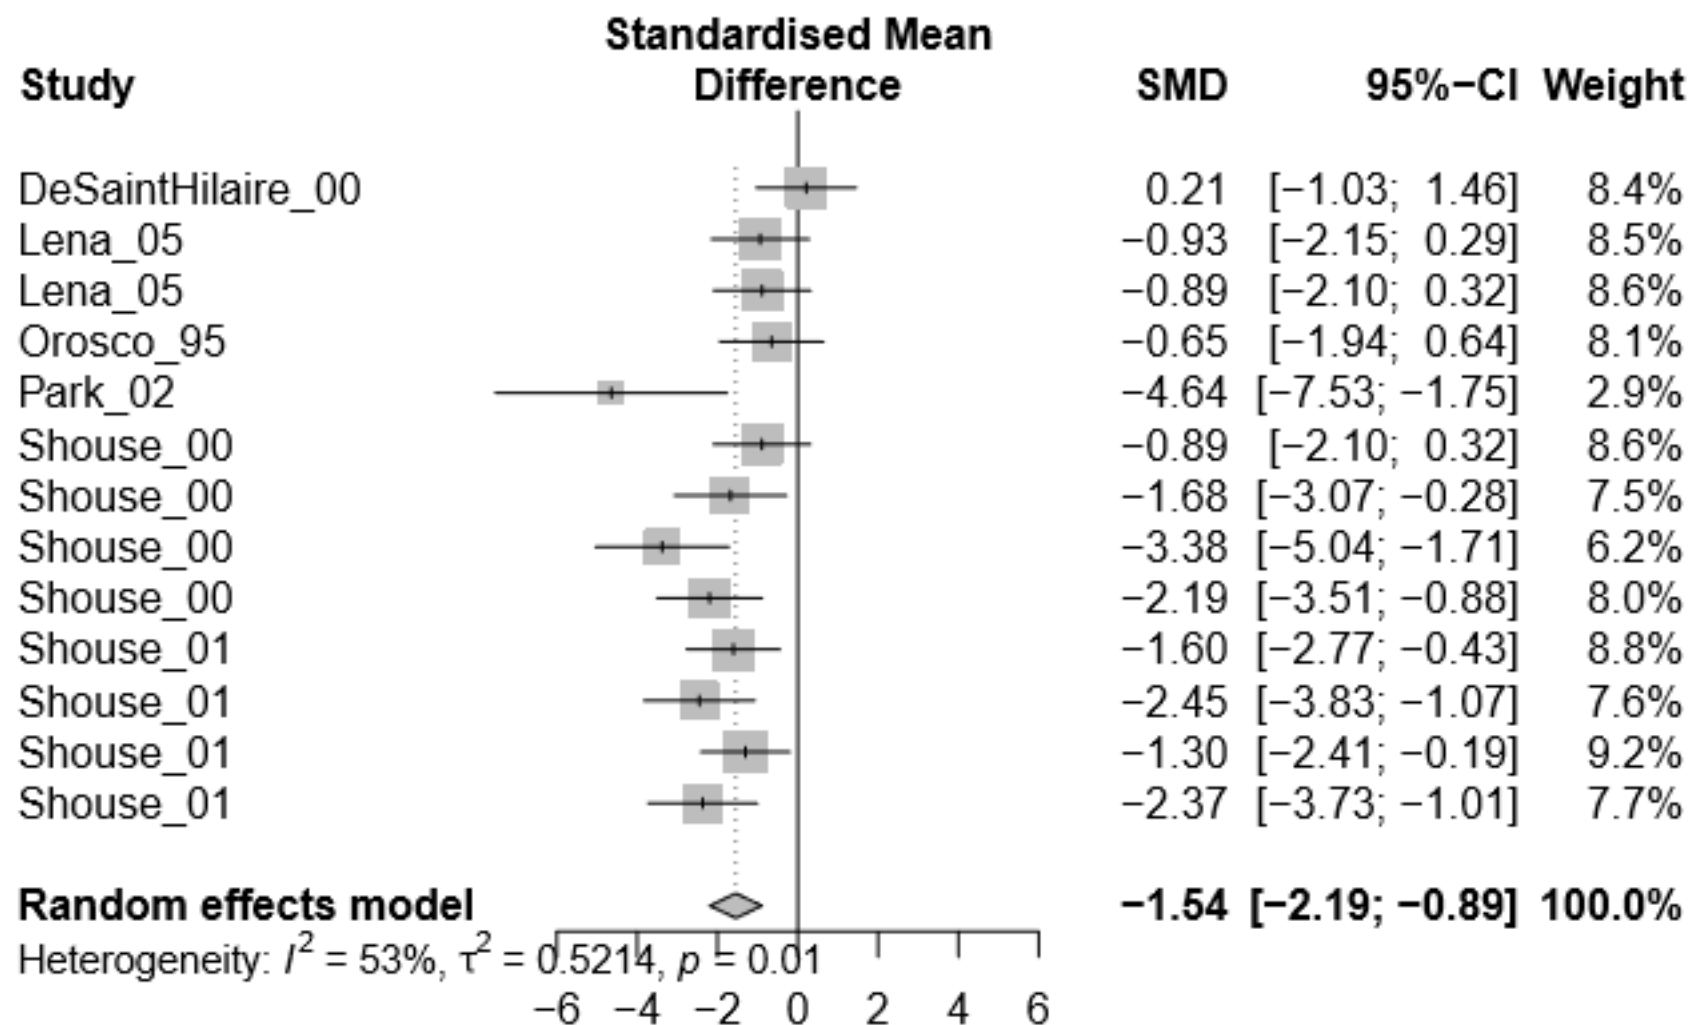

Appendix 8: Forest plot comparing noradrenaline concentration (nanomole/L) during wake and rapid-eye movement sleep

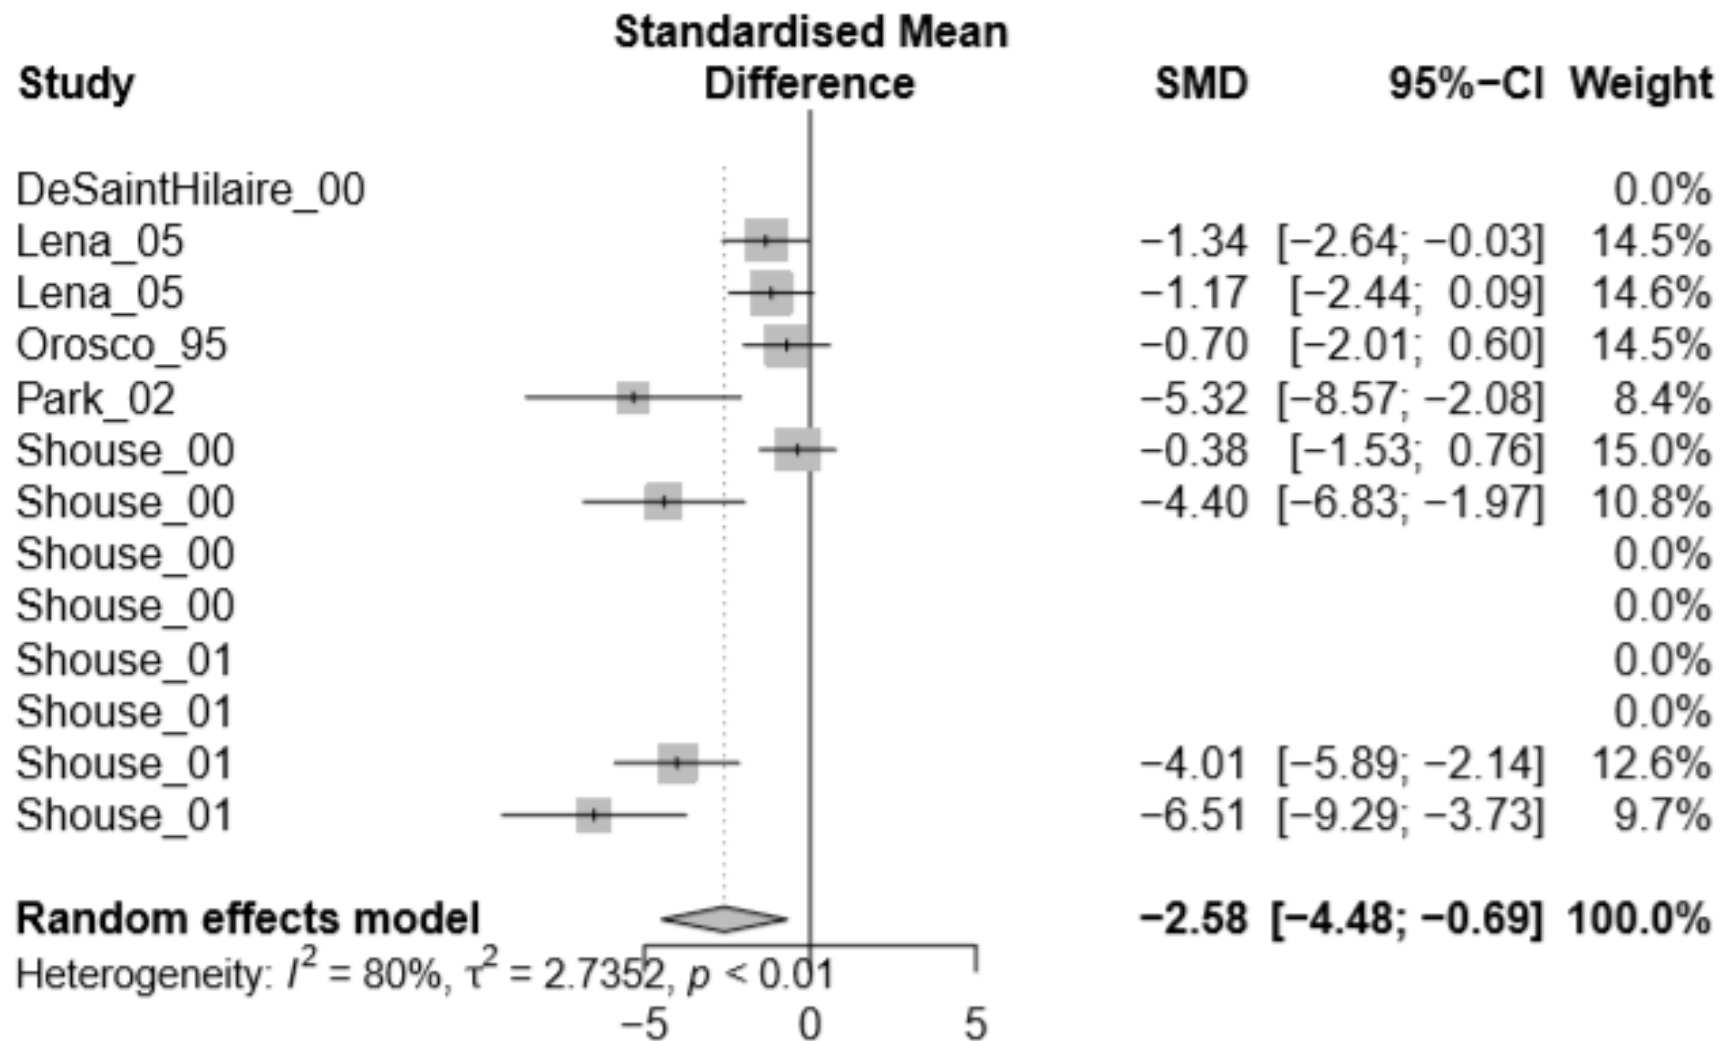

Supplement: jcr-17-174-s1.pdf [file jcr-17-174-s1.pdf]
